# Supplementary material for: DUB3 Deubiquitylating Enzymes Regulate Hippo Pathway Activity by Regulating the Stability of ITCH, LATS and AMOT Proteins
Source: PubMed Central journal article supplement (PMC5218808; doi:10.1371/journal.pone.0169587), 2017-01-06
Supplement: pone.0169587.s002.pdf [file pone.0169587.s002.pdf]

**Supplemental Figure S2.** Effect of shRNAs and siRNAs on DUB3 mRNA expression.

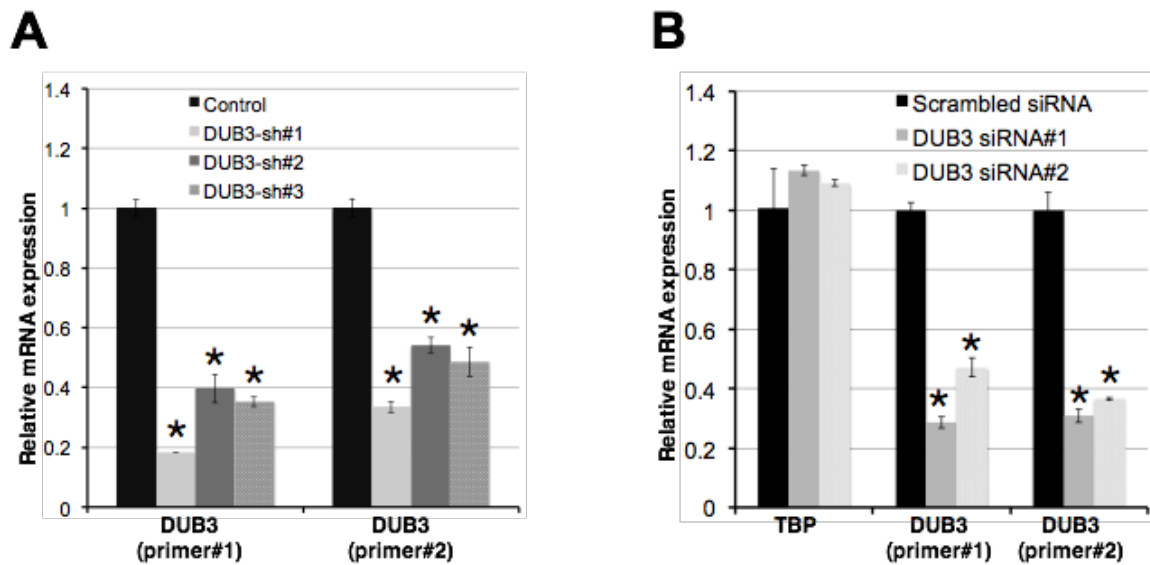

Controls for the efficacy of shRNAs and siRNAs on DUB3 mRNA expression. **(A)** HEK293T cells were transfected with a control vector or with independent shRNAs targeting DUB3. **(B)** HEK293T cells were transfected with a control siRNA (scrambled sequence) or independent siRNAs targeting DUB3. Expression of DUB3 mRNA was measured by quantitative real-time RT-PCR (qPCR) using two independent pairs of primers. Primer pair #1 was used subsequently for measuring DUB3 expression. GAPDH mRNA was used for normalization. Data represent the average of 3 independent experiments  $\pm$  SD. \* indicates  $p < 0.05$  (Student's T-test, 2-tailed unequal variance) comparing the test and control samples.
