# Supplementary material for: DUB3 Deubiquitylating Enzymes Regulate Hippo Pathway Activity by Regulating the Stability of ITCH, LATS and AMOT Proteins
Source: PubMed Central journal article supplement (PMC5218808; doi:10.1371/journal.pone.0169587), 2017-01-06
Supplement: pone.0169587.s005.pdf [file pone.0169587.s005.pdf]

**Supplemental Figure S5.** YAP localization in BJ cells depleted of DUB3

**(A)**

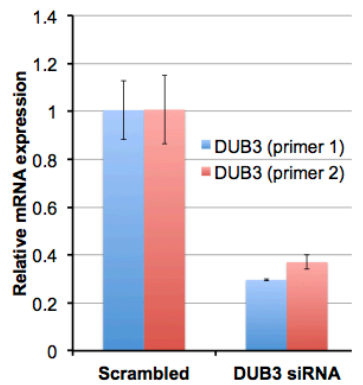

BJ<sup>p53kd/p16kd/HRas</sup> cells were seeded for 24h before being transfected with DUB3-specific siRNAs or scrambled controls. Transfected cells were fixed after 36h and stained with YAP antibody (Santa Cruz, sc-101199). qPCR was used to confirm the depletion of DUB3.

**(B)**

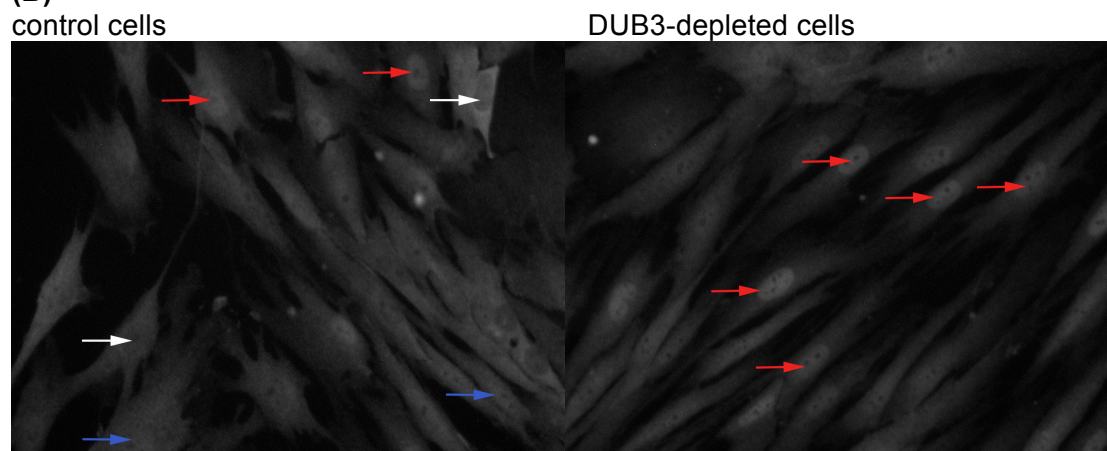

Representative images of BJ cells stained with anti-YAP treated as described in panel A. YAP localization was scored as: less YAP in the nucleus compared to the cytoplasm (e.g. white arrows); equal in cytoplasm and nucleus (e.g. blue arrows); and YAP higher in the nucleus (e.g. red arrows).

|               | number of cells         |                          |                         |
|---------------|-------------------------|--------------------------|-------------------------|
|               | <u>less nuclear YAP</u> | <u>even distribution</u> | <u>more nuclear YAP</u> |
| control siRNA | 118                     | 120                      | 84                      |
| DUB3 siRNA    | 54                      | 239                      | 177                     |
|               | % of cells              |                          |                         |
| control siRNA | 37                      | 37                       | 26                      |
| DUB3 siRNA    | 11                      | 51                       | 38                      |

DUB3 depletion caused a significant shift towards nuclear YAP ( $p < 0,0001$ ; Chi-square test).
