# Supplementary material for: DUB3 Deubiquitylating Enzymes Regulate Hippo Pathway Activity by Regulating the Stability of ITCH, LATS and AMOT Proteins
Source: PubMed Central journal article supplement (PMC5218808; doi:10.1371/journal.pone.0169587), 2017-01-06
Supplement: pone.0169587.s010.pdf [file pone.0169587.s010.pdf]

**Supplemental Figure S10.** DUB3 interacts with LATS2 protein and suppresses its ubiquitylation.

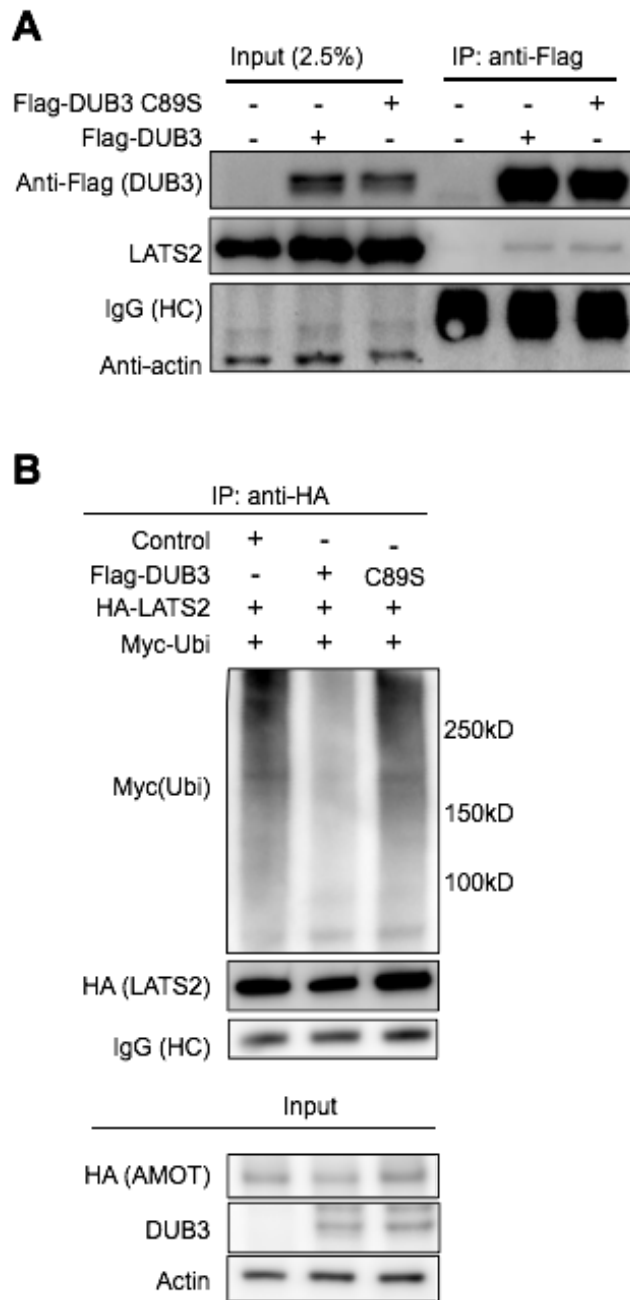

(A) HEK293T cells were transfected to express Flag-DUB3, its inactive mutant C89S or a control vector. Transfected cells were treated with 5 $\mu$ M of MG132 overnight before being subjected to immunoprecipitation with anti-Flag. Blots were probed with antibodies against Flag, LATS2, HA and actin.

(B) HEK293T cells were transfected to express HA-LATS2 and myc-ubiquitin along with Flag-DUB3, its inactive mutant C89S or a control vector. Cells were treated with 5 $\mu$ M of MG132 overnight before being subjected to immunoprecipitation with anti-HA. Blots were probed with antibodies against Myc, LATS2, HA, DUB3 and actin.
