# Supplementary material for: DUB3 Deubiquitylating Enzymes Regulate Hippo Pathway Activity by Regulating the Stability of ITCH, LATS and AMOT Proteins
Source: PubMed Central journal article supplement (PMC5218808; doi:10.1371/journal.pone.0169587), 2017-01-06
Supplement: pone.0169587.s011.pdf [file pone.0169587.s011.pdf]

**Table S1.** Sequences of shRNA targets, siRNAs and qPCR primers

| <b>Gene</b>       | <b>Sequence</b>                          |
|-------------------|------------------------------------------|
| DUB3              | sh1 target sequence: GATTGCCAAGAATGTGCAA |
|                   | sh2 target sequence: GCTCCCTGCTAAACCTCTC |
|                   | sh3 target sequence: GCAGGAAGATGCCCATGAA |
| DUB3 siRNA Pool 1 | J-027332-11: ACAAGCAGGTAGATCATCA         |
|                   | J-027332-13: CTAACCTCTCTTCGACGA          |
|                   | J-027332-24: CGGGAGCACTCTCAAACAT         |
|                   | J-027332-25: CGAAATACAAGTGTGGGAT         |
| DUB3 siRNA Pool 2 | 190106-05: GGCTGTATGCTCTGTACGA           |
|                   | 190106-06: AGGTGGATCATCACTCTAA           |
|                   | 190106-07: CGACGTACTTGTGATTCAT           |
|                   | 190106-08: CCAGCAAGCTTTGGAACAG           |
| DUB3 primer#1     | Forward:5'-GCTCTTTCCACCAAGTGCTC-3'       |
|                   | Reverse: 5'-CAGAAGACACAGACAGGCCGA-3'     |
| DUB3 primer#2     | Forward:5'-CCTCCCGACGTACTTGTGAT-3'       |
|                   | Reverse:5'-CATGGACTCCTGATGTGTCG-3'       |
| TBP               | Forward:5'-CGCCGAATATAATCCCAAGC-3'       |
|                   | Reverse:5'-TCCTGTGCACACCATTTTCC-3'       |
| LATS2             | Forward:5'-TTGCTGATGTACTCCAGGGC-3'       |
|                   | Reverse: 5'-AATGCTGCAGGAAGTGGTG-3'       |
| LATS1             | Forward:5'-AGCTTGTGGTGGAATGTGAA-3'       |
|                   | Reverse: 5'-TGGGACAACCTCCTTTCTTG-3'      |
| YAP               | Forward :5'-GCAACTCCAACCAGCAGCAACA-3'    |
|                   | Reverse: 5'-CGCAGCCTCTCCTTCTCCATCTG-3'   |
| TAZ               | Forward :5'-ATTCATCGCCTTCCTAGGGT-3'      |
|                   | Reverse: 5'-GGCTGGGAGATGACCTTCAC-3'      |
| ITCH              | Forward:5'-GAGGCTACCCATTGAACCAA-3'       |
|                   | Reverse: 5'-AACGCCTTAACCCAAGGAAG-3'      |
| AMOT              | Forward:5'-CTTGATGGCCAATAAGCGTTGCCT -3'  |
|                   | Reverse: 5'-GCAAGCCTGATCCAGCATTGGAAA -3' |
| NEDD4             | Forward:5'-AAAGGGGGACCATCTCAGTT-3'       |
|                   | Reverse: 5'-CCTTCAGGGAGCTGCTAAGA-3'      |
| SMURF1            | Forward:5'-AGACCCATCCACGACAATCT-3'       |
|                   | Reverse: 5'-CAGCATCAAGATCCGTCTGA-3'      |
| AMOT              | Forward:5'-CTTGATGGCCAATAAGCGTTGCCT -3'  |
|                   | Reverse: 5'-GCAAGCCTGATCCAGCATTGGAAA -3' |
| AMOT L1           | Forward:5'-GGACAGGACTACTGGGGCTA-3'       |
|                   | Reverse: 5'-GAACTAGCCATGATCGCCTC-3'      |
| AMOT L2           | Forward:5'-CATCTCTCGCTCCAGCTTCT-3'       |
|                   | Reverse: 5'-CCTGGCAAGCAAGACACAG-3'       |
| Cyr61             | Forward: 5'-TATTCACAGGGTCTGCCCTC-3'      |
|                   | Reverse: 5'-AACGAGGACTGCAGCAAAA-3'       |
| ANKRD1            | Forward: 5'-GTGTAGCACCAGATCCATCG-3'      |
|                   | Reverse: 5'-CGGTGAGACTGAACCGCTAT-3'      |
