# Supplementary material for: DUB3 Deubiquitylating Enzymes Regulate Hippo Pathway Activity by Regulating the Stability of ITCH, LATS and AMOT Proteins
Source: PLOS journal article supplement (doi:10.1371/journal.pone.0169587), 2017-01-06
Supplement: S7 (10.1371/journal.pone.0169587.s007) [file journal.pone.0169587.s007]

**Supplemental Figure S7.** Interaction between endogenous ITCH and DUB3.

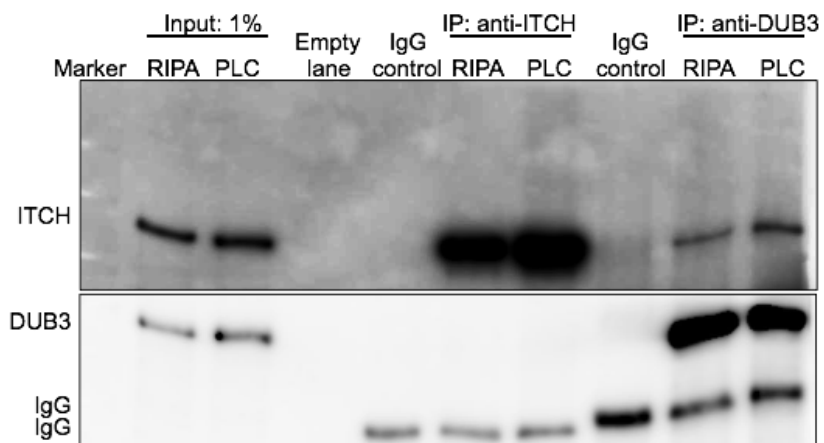

Immunoprecipitation assays. HEK293T cells were treated with 5 $\mu$ M MG132 to block proteasome function 24h before cells were harvested for IP by lysing in PLC buffer, or a modified RIPA buffer containing 10% glycerol. Lysates were immunoprecipitated with anti-ITCH or anti-DUB3 antibodies or isotype-matched control antibodies. Blots were probed with anti-ITCH, anti-DUB3 antibodies. Endogenous ITCH was recovered in the DUB3 IP, but DUB3 was not recovered in the ITCH IP.
